# Supplementary material for: Phytochemical Diversity in Rhizomes of Three Reynoutria Species and their Antioxidant Activity Correlations Elucidated by LC-ESI-MS/MS Analysis
Source: PubMed Central journal article supplement (PMC6470775; doi:10.3390/molecules24061136), 2019-03-21
Supplement: molecules-24-01136-s001.pdf [file molecules-24-01136-s001.pdf]

Table S1. Multi-component one-way ANOVA results for Table 2.

| Extract/Fraction              | 1     | 2  | 3    | 4    | 5    | 6   | 7     | 8   | 9    | 10   | 11    | 12 | 13   | 14 | 15    | 16    | 17 | 18  |
|-------------------------------|-------|----|------|------|------|-----|-------|-----|------|------|-------|----|------|----|-------|-------|----|-----|
| 1.Acetone <i>R.j</i>          |       | *  |      |      | **/* | *   | ***/* | *   |      | *    | ***   | *  | **/* | *  |       |       |    | *   |
| 2.Dichloromethane <i>R.j</i>  | *     |    | *    | *    | *    | *   | *     | */  | *    | *    | *     | *  | *    | */ | *     | *     | *  | */  |
| 3.Diethyl ether <i>R.j</i>    |       | *  |      |      |      | *   | ****  | *   | **** | *    | ****  | *  | **** | *  | ***   | ***   |    | *   |
| 4.Ethyl acetate <i>R.j</i>    |       | *  |      |      |      | *   |       | *   | **** |      |       | *  | *    | *  | ****  | ****  |    | *   |
| 5.Butanol <i>R.j</i>          | **/*  | *  |      |      |      | *   | ***   | *   |      | *    | ***   | *  | **   | *  |       |       |    | *   |
| 6.Water <i>R.j</i>            | *     | *  | *    | *    | *    |     | *     | *** | *    | *    | *     | *  | *    | *  | *     | *     | *  | *** |
| 7.Acetone <i>R.s</i>          | ***/* | *  | **** |      | ***  | *   |       | *   |      | *    | ***/* | *  | */   | *  |       |       |    | *   |
| 8.Dichloromethane <i>R.s</i>  | *     | */ | *    | *    | *    | *** | *     | *   | *    | *    | *     | */ | *    | */ | *     | *     | */ | *** |
| 9.Diethyl ether <i>R.s</i>    |       | *  | **** |      |      | *   | ****  | *   |      | *    | **/*  | *  | **** | *  |       | */    | ** | *   |
| 10.Ethyl acetate <i>R.s</i>   | *     | *  | *    |      | *    | *   | *     | *   | *    |      |       | *  | *    | *  | *     | **/*  |    | *   |
| 11.Butanol <i>R.s</i>         | ***   | *  | **** |      | ***  | *   | ***/* | *   | **   |      |       | *  | */   | *  |       |       | ** | *   |
| 12.Water <i>R.s</i>           | *     | *  | *    | *    | *    | *   | *     | */  | *    | *    | *     |    | *    | */ | *     | *     | *  | *   |
| 13.Acetone <i>R.b</i>         | **/*  | *  | **** | *    | **   | *   | */    | *   |      | *    | */    | *  |      | *  | *     | *     | *  | *   |
| 14.Dichloromethane <i>R.b</i> | *     | */ | *    | *    | *    | *   | *     | */  | *    | *    | *     | */ | *    |    | *     | *     | *  | *   |
| 15.Diethyl ether <i>R.b</i>   |       | *  | ***  | **** |      | *   |       | *   |      | *    |       | *  | *    | *  |       | ***/* |    | *   |
| 16.Ethyl acetate <i>R.b</i>   |       | *  | ***  | **** |      | *   |       | *   | */   | **/* |       | *  | *    | *  | ***/* |       |    | *   |
| 17.Butanol <i>R.b</i>         |       | *  |      |      |      | *   |       | */  |      |      | **    | *  | *    | *  |       |       |    | *   |
| 18.Water <i>R.b</i>           | *     | */ | *    | *    | *    | *** | *     | *** | *    | *    | *     | *  | *    | *  | *     | *     | *  |     |

Values that are significantly different at  $P \leq 0.05$  (\* for DPPH), and that are not significantly different at  $P \leq 0.05$  (\*\* for AAE 37 °C, \*\*\* for AAE 90 °C, \*\*\*\* for LA-Peroxidation) determined by ANOVA with Duncan's post-hoc test.

Table S2. Multi-component one-way ANOVA results for Table 3, Figure 8 and Figure 9.

| Extract/Fraction              | 1     | 2        | 3    | 4    | 5        | 6        | 7        | 8   | 9    | 10   | 11   | 12     | 13   | 14       | 15   | 16       | 17  | 18       |
|-------------------------------|-------|----------|------|------|----------|----------|----------|-----|------|------|------|--------|------|----------|------|----------|-----|----------|
| 1.Acetone <i>R.j</i>          |       |          |      |      |          |          | *        |     | **   |      | ***  |        | **** |          |      |          | **  |          |
| 2.Dichloromethane <i>R.j</i>  |       |          |      |      |          |          |          |     |      |      |      |        |      | */**/*** |      |          |     | ***      |
| 3.Diethyl ether <i>R.j</i>    |       |          |      |      |          |          |          |     |      |      |      |        | *    | ****     | ***  | ***      |     |          |
| 4.Ethyl acetate <i>R.j</i>    |       |          |      |      | ****     |          | ****     |     |      |      |      |        |      |          |      | ****     |     |          |
| 5.Butanol <i>R.j</i>          | *     |          |      | **** |          |          | */**/*** |     |      |      |      |        | ***  |          |      | */**/*** | *** |          |
| 6.Water <i>R.j</i>            |       |          |      |      |          |          |          | *   |      |      |      | **/*** |      | ***      |      |          |     | */**/*** |
| 7.Acetone <i>R.s</i>          | */*** |          |      | **** | */**/*** |          |          |     |      |      | ***  |        |      |          |      | **       |     |          |
| 8.Dichloromethane <i>R.s</i>  |       |          |      |      |          | *        |          |     |      |      |      | **     |      |          |      |          |     | *        |
| 9.Diethyl ether <i>R.s</i>    | **    |          |      |      |          |          |          |     |      |      | *    |        |      |          | **** |          | **  |          |
| 10.Ethyl acetate <i>R.s</i>   |       |          |      |      |          |          |          |     |      |      | **** |        |      |          | */** |          |     |          |
| 11.Butanol <i>R.s</i>         | ***   |          |      |      |          |          | ***      |     | *    | **** |      |        |      |          |      |          |     |          |
| 12.Water <i>R.s</i>           |       |          |      |      |          | **/***   |          | *** |      |      |      |        |      | *        |      |          |     |          |
| 13.Acetone <i>R.b</i>         | ****  |          | *    |      | ***      |          |          |     |      |      |      |        |      |          |      |          | *** |          |
| 14.Dichloromethane <i>R.b</i> |       | */**/*** | **** |      |          | ***      |          |     |      |      |      | *      |      |          | **** |          |     | ***      |
| 15.Diethyl ether <i>R.b</i>   |       |          | ***  |      |          |          |          |     | **** | */** |      |        |      | ****     |      | ***      |     |          |
| 16.Ethyl acetate <i>R.b</i>   |       |          | ***  | **** | */**/*** |          | **       |     |      |      |      |        |      |          | ***  |          | *   |          |
| 17.Butanol <i>R.b</i>         | **    |          |      |      | ***      |          |          |     | **   |      |      |        | ***  |          |      | *        |     |          |
| 18.Water <i>R.b</i>           |       | ***      |      |      |          | */**/*** |          | *   |      |      |      |        |      | ***      |      |          |     |          |

Values that are not significantly different at  $P \leq 0.05$  (\* for TPC Total polyphenols, \*\* for Tannins, \*\*\* for DMACA, \*\*\*\* for HCL-Butanol) determined by ANOVA with Duncan's post-hoc test.
